# Supplementary material
Source: PubMed Central journal article supplement (PMC3973066)
Supplement: 13238_2013_15_MOESM2_ESM.pdf [file 13238_2013_15_MOESM2_ESM.pdf]

**Supplementary Table1**

List of qPCR primers used in this study

|              |                         |
|--------------|-------------------------|
| pig-Pax6 F   | GAGTTCTTCGCAACCTGGCTA   |
| pig-Pax6 R   | TGGTATTCTCTCCCCCTCCTT   |
| pig-Tuj1 F   | GTGGTGCGGAAGGAGTGTG     |
| pig-Tuj1 R   | TGGTGGATGGACAGCGTGG     |
| pig-NCAM F   | CGGAGGGAAGCACACGGAG     |
| pig-NCAM R   | CGCTTTGCTCTCGTTCTCCTT   |
| pig-GFAP F   | TTGACCTGCGACGGGAGTC     |
| pig-GFAP R   | AGGTGGCGATCTCGATGTCC    |
| pig-GAPDH F  | TCGGAGTGAACGGATTTG      |
| pig-GAPDH R  | CCTGGAAGATGGTGATGG      |
| pig-MBP F    | GAGGCAGAGCTCCTGACTACAAA |
| pig-MBP R    | GTCCCGTCCTCCCAGCTT      |
| pig-Nestin F | GTCCGCTGCTGCTCCCTTGG    |
| pig-Nestin R | AGGGGCGCTTGGGGACATCT    |
| EBNA-1 F     | ATCAGGGCCAAGACATAGAGATG |
| EBNA-1 R     | GCCAATGCAACTTGGACGTT    |
